# Supplementary material for: Examination on total ozone column retrievals by Brewer spectrophotometry using different processing software
Source: Copernicus journal article supplement (doi:10.5194/amt-2017-441), 2018-01-12
Supplement: Supplementary file [file amt-2017-441-AC2-supplement.pdf]

## **Anonymous Referee #1**

The author would like to thank the reviewer for constructive comments and suggestions that were taken into account. Please find our response to your comments (in bold). The responses are listed below each question.

We have made changes to the original manuscript and the changes were written in italics.

**General comments: This paper provides comparison of three data retrieval software available to Brewer spectrophotometer users. As the data retrieved with different software might sometimes be compared to each other or used side by side without knowing the original software used, the information about any possible biases or false trends or other discrepancies any algorithm might produce is important. This is especially true for Brewer instruments that are, together with Dobson spectrometers, the most reliable source of total ozone column data. The way each software tracks changes and drifts in the instrument are considered in the paper. Mean biases in comparison to other software are defined. However there is no discussion if using specific software could affect the trends in any way.**

The analysis of the trends was included. Additional sections were added in Method (2.6) and Results (3.4):

### **2.6 Trend analysis**

*To assess whether a specific software could affect the trend, we estimated the trend from the annual mean anomalies. We applied the same methodology proposed by Fountoulakis et al., (2016). Climatological ozone values for each day were calculated over the period under study. The daily anomaly with respect to the daily climatological value was calculated. Afterward the monthly anomalies were determined by averaging the daily anomalies for each month provided that at least 15 days of data were available. Finally the monthly anomalies were averaged to determine the annual mean anomalies. The statistical significance of the trends is derived from the Mann–Kendall test with statistical significance set at  $p \leq 5\%$ .*

### **3.4 Comparison among the trends estimated by the three processing software ozone retrievals**

*The detected trends in ozone series calculated by using the three processing software are reported in Table 6. The trends were quantified over the period 2005-2015 for Rome to be consistent with the EUBREWNET ozone data coverage, and 2007 -2015 for Aosta. Ozone data which showed large differences among the codes were not included in the trend analysis.*

*The QBO and solar cycle effects were not filtered in the ozone series. The former was found small at the mid-latitude station (Fountoulakis et al., 2016), whereas the latter was not taken into account due the length of the analysed ozone series (< 11 years). All trends were found to be not statistically significant ( $p$ -value is 0.05).*

*It is clear from Table 6 that there are not significant differences in the trends among the three codes, when data affected by rapidly changes in R6 or the spectral response of the instrument shows a persistent drift, were removed.*

**Table 6.** *The total ozone linear trends derived by the processed ozone values using three different processing codes*

|              | <i>period</i>    | <i>BPS</i><br><i>(% per decade)</i> | <i>O3Brewer</i><br><i>(% per decade)</i> | <i>EUBREWNET</i><br><i>(% per decade)</i> |
|--------------|------------------|-------------------------------------|------------------------------------------|-------------------------------------------|
| <i>Rome</i>  | <i>2005-2015</i> | <i>-0.23 ± 0.18</i>                 | <i>-0.32 ± 0.20</i>                      | <i>-0.34 ± 0.21</i>                       |
| <i>Aosta</i> | <i>2007-2015</i> | <i>0.07 ± 0.35</i>                  | <i>0.04 ± 0.34</i>                       | <i>0.00 ± 0.38</i>                        |

**While the differences between the software are quite nicely quantified, the analysis does not go very deep into thinking what could cause the differences. Only source of difference considered in more detail was the way to apply standard lamp test information. The standard lamp test being the way to follow the changes in the instruments spectral sensitivity that affects the ozone retrieval significantly. However even for this variable there was no quantification of its effect; if it explains all the difference or not. Also using only the daily averages produced by the software, the information is lost if the differences are due to different way of selecting "good" measurements or because of something that happens when processing a single measurement. There should be more detailed analysis if the standard lamp correction makes all the difference or if there is more reasons and what the reasons could be. Also comparison of data rejection rules is required when comparing daily average values.**

We decided to rework the paper performing additional analysis on both daily means and individual calculated ozone values to better investigate the differences found among the three processing software. The last version of BPS and O3Brewer was applied taking into account the same rejection criteria on ozone values used by EUBREWNET, i.e. maximum standard deviation of 2.5 DU and maximum ozone air mass of 3.5. TOC. This issue was specified as follows:

*In this study we analysed individual DS values and daily averages of Rome and Aosta stations, generated by BPS version 2.1.1 updated to 2017/02/14 (Fioletov and Ogyu, 2007), by O3Brewer software packages version 6.0 updated to 2018/03/14, and EUBREWNET level 1.5 ozone products. Level 1.5 individual TOC values are discarded when the standard deviation is above 2.5 DU and the maximum ozone air mass is above 3.5. In addition ozone values less than 100 DU and greater than 500 DU are also rejected. The stray light correction was not applied because it requires a calibration against a double monochromator Brewer and an instrumental characterization (Karppinen et al., 2015, Redondas et al., 2016) which was not available. Level 1.5 TOC values were downloaded from EUBREWNET platform over the period 2005-2015 at Rome and 2007-2015 at Aosta.*

We set in the configuration file of BPS and O3Brewer software, where it is suitable, the same rejection criteria used in EUBREWNET, i.e. maximum standard deviation of 2.5 DU and maximum ozone air mass of 3.5. TOC.

The rejection criteria on ozone values are hardcoded and consist on three sequential checks: 1) if raw counts are less than 2500, the value is rejected; 2) if calculated ozone for DS/ZS is less than 50 DU, the value is rejected 3) if observation is in the DS mode and the calculated ozone is between 50 and 100 DU, the value is rejected (Ogyu, personal communication 2018).

The maximum calculated ozone is indeed configurable in the BPS setup and was set to 500 DU.

The limits on the calculated ozone are not configurable in the O3Brewer setup. In the latest version used in this study, the standard lamp maximum for applying of ETC correction from SL test results is now configurable. Here we used the default limit of 500 units for the difference between  $R6$  and the reference  $R6_{ref}$ .

**I found the paper quite well structured in general but there were some irregularities that are highlighted in specific and technical comments. The language was heavy to read at times, when too much information was being compressed into a single sentence. This was highlighted by extensive use of parentheses.**

We eliminated the use of parentheses as much as possible.

#### **Specific comments:**

**Abstract line 32: if the difference between software is in order of the instrument uncertainty is it a good result? I would expect different software that calculate the same thing to be well within the uncertainty of the measurement itself.**

The paragraph was rephrased as:

*The overall agreement of the BPS and O3Brewer TOC data with EUBREWNET data is very good and within the estimated total uncertainty in the retrieval of total ozone from Brewer spectrophotometer (1%). However differences can be found depending on the software in use. Such differences become larger when the instrumental sensitivity exhibits a long-term drift which can affect the ozone retrievals significantly. Besides that reason, if daily mean values are directly generated by the software, differences can be observed due to the configuration set by the user to process single ozone measurement and the rejection conditions applied to data to calculate the daily value.*

**page 3 line 51 inaccurate phrasing, maybe "...to measure ground level spectral intensities of solar ultraviolet radiation attenuated by ozone absorption. Form these spectra it is possible...**

The phrase was modified as:

*The most common ground-based instruments to measure TOC are spectrophotometers which are designed to measure ground level spectral intensities of solar ultraviolet radiation attenuated by ozone absorption. From these spectra, it is possible to retrieve the TOCs.*

**line 108 "by measuring irradiances of the direct sunlight,..." there are also measurement mode for focused sun (Josefsson, W. A. P. (1992), Focused sun observations using a Brewer ozone spectrophotometer, J. Geophys. Res.,C297(D14), 15813–15817, doi:10.1029/92JD01030.) Perhaps the other modes are entitled to some reference if the global irradiance one is?**

The reference Josefsson, W. A. P. (1992), was acknowledged as well as the other modes (zenith sky light and the moon light) and the references were also acknowledged:

*The Brewer instrument is a spectrophotometer designed to retrieve the total ozone column by measuring irradiances of both direct sunlight (Kerr et al., 1981) and polarized radiation scattered from the zenith sky (Brewer and Kerr, 1973, Muthama et al., 1995). Total ozone can be also derived from focused sun measurements, commonly employed at high latitudes (Josefsson, 1992). It is also possible to measure total ozone by using the moon as a light source (Kerr et al., 1990), or the global irradiance method (Kerr and Davis, 2007) in the UV region.*

*Brewer, A.W. and Kerr, J. B.: Total ozone measurements in cloudy weather, Pure appl. Geophys. 106-108, 928-937, 1973.*

*Josefsson, W. A. P.: Focused sun observations using a Brewer ozone spectrophotometer, J. Geophys. Res.,97(D14), 15813–15817, doi:10.1029/92JD01030,1992.*

*Kerr, J.B., McElroy C.T., Wardle D.I. and Dorokhov V.: Measurements of arctic total ozone during the polar winter, Atmosphere-Ocean, 28:4, 383-392, 1990.*

*Kerr, J. B., McElroy, C. T., and Olafson, R. A.: Measurements of total ozone with the Brewer spectrophotometer, in Procs. of the Quadrennial Ozone Symposium, edited by J. London, 74–79, Natl. Cent. for Atmos. Res., Boulder, Colo.11., 1981.*

*Kerr, J.B., McElroy C.T., Wardle D.I. and Dorokhov V.: Measurements of arctic total ozone during the polar winter, Atmosphere-Ocean, 28:4, 383-392, 1990.*

*Muthama N.J., Scimia U., Siani A.M., Palmieri S.: Toward optimizing Brewer zenith sky total ozone measurements at the Italian stations of Rome and Ispra, J. Geophys. Res.,100, 3017-3022, 1995.*

**line 113 Don't both these papers conclude the ds accuracy of 1%?**

We agree and it was specified that: *It was shown (Vanicek, 2006) that the accuracy of measurements taken with a well-maintained Brewer spectrophotometer is 1% in the DS mode and 3-4% in the ZS mode. The random errors of individual measurements were found to be within  $\pm 1\%$  for all measurements (Fioletov et al., 2005).*

**line 118 the slit information is very specific so you need to introduce the operation of the slitmask before. Maybe leave out the specific slit number and just say wavelengths are selected by rapidly rotating slitmask and photon counts are registered by a photomultiplier.**

We added that: *The wavelengths are selected by a rapidly rotating slit-mask and raw photon counts for each slit-mask wavelength position are registered by a photomultiplier. Each run cycles the slit-mask through a number of oscillations (nominally 20) accumulating photon counts for each slit.*

**line 120 Maybe highlight that dark count and dead time are characteristics of the photomultiplier to help people not familiar with Brewers to have a clue what these are.**

We agree with the suggestion and we included that: *The raw photon counts are then converted into count rates that are corrected for the characteristics of the photomultiplier (dark count and dead time) and for the internal Brewer temperature (Kerr, 2010).*

**line 124 you have only introduced four wavelengths so no need to say "longer" here line 143 suggested change "weighted ozone absorption coefficient" to " differential ozone absorption coefficient"**

“weighted ozone absorption coefficient” was replaced by “*differential ozone absorption coefficient*”

**line 162 change to "conditions with small..."**

done

**line 184 mentioning the slit mask here also makes it even more important to introduce its meaning earlier in the text**

we agree and the meaning of the slit mask was introduced earlier-

**line 207 Highlight that the reference value is determined at every calibration.**

The above suggestion was inserted

**line 211 Hard to interpret but i think i finally understood it. Suggest to give out the normal case first ( $\text{abs}(r6_{\text{ref}} - r6) \leq 250$  units).**

We rephrased many parts of the section (2.1) describing the SL correction applied by the processing software, as follows:

*Depending on the processing software used by the station operator,  $\Delta SL$  is computed in different ways, not always clearly explained by the software documentation:*

- *In the BPS, the reference value  $R6_{ref}$  is determined with a triangular smoothing filter of SL-test values over the 15 day period immediately following the calibration date. There should be at least one good SL-test value per day. If the corresponding B-files are not available, the program is not able to establish the reference SL level and the ETC will be not adjusted. Notice that for other processing software  $R6_{ref}$  is based on the SL-test values during the calibration campaign. If the  $abs(R6_{ref} - R6) \leq 250$  units, then the median of daily averages from all R6 data before 15 days and after 15 days for a particular day is used for the correction. The median is used because it is less influenced by single invalid R6s. If the  $abs(R6_{ref} - R6)$  is above 250 units then ETC is adjusted taking into account the difference between the  $R6_{ref}$  and the present daily mean values of R6. That correction is reported in the file named “o3data” produced by the BPS. The threshold and the time window are however not adjustable by the users (Fioletov personal communication, 2018).*

- *O3Brewer adjusts the ETC using a Gaussian smoothing filter on R6 values (Stanek M., 2016). There should be SL measurements 10 days before and 10 days after the selected date period-The software creates the smoothed R6 time series (hereafter named  $R6_{smooth}$ ) which is used for ETC adjustment. It means that there should be at least one SL test per day. There was a limit between R6 and the reference  $R6_{ref}$  for applying of ETC correction from SL test results which is configurable in the latest version (Stanek personal communication, 2018). The time window is however not adjustable by the users. If this difference exceeds the threshold, then the software can remember the last day with good SL test and will apply that correction (Stanek personal communication, 2018). This option can be turned off and then the daily mean values for SL are used for the correction of the ETC.*

- *Level 1.5 total ozone column data from EUBREWNET are recalculated with the  $\Delta SL$  correction determined applying a triangular moving average over the daily median values of R6 within a seven days window (default time window). The correction is applied if the difference between  $R6_{ref}$  and the calculated value exceeds 5 units. Level 2.0 are 1.5 observations validated with a posterior calibration. If the reference constants of a posteriori calibration do not differ significantly from the values in use then level 1.5 products are not*



reprocessed and represent the most reliable products (<http://rbcce.aemet.es/dokuwiki/doku.php>).

At the present time, tools for Level 2.0 are developed but not yet implemented. A complete description of the processing can be found on the EUBREWNET website (2017).

**The way BPS determines the  $r_6$  reference value may already introduce offset as for others the  $r_6$  is given by hand after the calibration based on the sl test values during calibration campaign. Offset probably very small though but should be looked into.**

Thanks to the reviewer for this important remark which was analysed. Section 3.1 was completely re-written and also attached at the end of this document. Concerning the BPS offset we included the following paragraph:

*The discrepancy between the two codes could have been caused by the offset introduced by the way BPS determines the  $R_6$  reference value as for the other code the  $R_{6_{ref}}$  is obtained during the calibration campaign and set manually in the configuration. The BPS  $R_{6_{ref}}$  is computed with a triangular smoothing filter of SL-test over the 15 day period after the calibration and it is calculated "on fly" from daily mean SL values and it is not stored (Fioletov, personal communication 2018). To look into the possible effect of the BPS offset we estimated  $R_{6_{ref\_BPS}}$ , for each day over the 15 days after the calibration by subtracting the correction (reported in the file *o3data.txt*) to the corresponding  $R_6$  value. Then the average over the 15  $R_{6_{ref\_BPS}}$  values was compared with  $R_{6_{ref}}$  (given by hand after the calibration). The estimated offset introduced by BPS with respect to  $R_{6_{ref}}$  is very small, ranging between -19 to 6 units at Rome and between -10 to 2 units at Aosta. Consequently the BPS offset appears not to be responsible for the ozone difference that can be attributed to the calculation method of the standard lamp correction.*

**line 228 There is a lot of information here not relevant of how the sl test is introduced in EUBREWNET algorithm.**

Only relevant information about Sl test was left, see above our previous answer to this issue.

**These differences of processing software specific rejection rules should be stated especially where they differ but this is not the right position for them as this paragraph was supposed to be about sl-test. Could you add data rejection criteria to a more suitable place in text?**

As suggested the rejection rules were moved and included in Section 2.3

*Level 1.5 individual TOC values are discarded when the standard deviation is above 2.5 DU and the maximum ozone air mass is above 3.5. In addition ozone values less than 100 DU and greater than 500 DU are also rejected. The stray light correction was not applied because it requires a calibration against a double monochromator Brewer and an instrumental characterization*

(Karppinen et al., 2015, Redondas et al., 2016) which was not available. Level 1.5 TOC values were downloaded from EUBREWNET platform over the period 2005-2015 at Rome and 2007-2015 at Aosta.

We set in the configuration file of BPS and O3Brewer software, where it is suitable, the same rejection criteria used in EUBREWNET, i.e. maximum standard deviation of 2.5 DU and maximum ozone air mass of 3.5. TOC.

The rejection criteria on ozone values are hardcoded and consist on three sequential checks: 1) if raw counts are less than 2500, the value is rejected; 2) if calculated ozone for DS/ZS is less than 50 DU, the value is rejected 3) if observation is in the DS mode and the calculated ozone is between 50 and 100 DU, the value is rejected (Ogyu, personal communication 2018).

The maximum calculated ozone is indeed configurable in the BPS setup and was set to 500 DU.

The limits on the calculated ozone are not configurable in the O3Brewer setup. In the latest version used in this study, the standard lamp maximum for applying of ETC correction from SL test results is now configurable. Here we used the default limit of 500 units for the difference between  $R6$  and the reference  $R6_{ref}$ .

**line 335 By using daily mean values you include the effect of different rejection criteria also. Would be good to see if there is more or less perfect agreement when comparing simultaneous measurements or if there are differences even then. Maybe there should have been a separate comparison of individual measurements and the resulting daily values? Comparing the individual measurements might have given more clue of the origin of the differences.**

**Usually daily values (or even more sparse time grid) are used for time series analysis, so it is important to see if any software introduces nonexistent drifts or biases to the data. Still, when comparing methods together it would be good to make more detailed analysis of where the differences come from.**

We analysed the time series of TOC daily means and individual ozone values. The whole section 3 was completely re-written, additional figures on individual ozone values were inserted.

**Figure 1 Why are there no points in 2008 summer in EUBREWNET data?**



It was specified in the caption of Figure 1 that: *At Aosta the EUBREWNET L1.5 ozone values were not generated between May 24 and September 8, 2008, because the standard lamp got burned out since May 2008 and was replaced in September 2008.*

**Figure 2 upper panel I don't understand. Here the cut-off for  $R6_{smooth}$  is for sure lower than 500 units which was stated to be the threshold earlier.**

In new section 3.1 the cut off was better explained:

*Looking at  $R6$  behaviour (Fig. 6 upper panel), it can be noticed that the sensitivity of the instrument at Rome has changed mainly in two periods (between 1994 and 1995, and between 2006 and 2007).  $R6_{smooth}$  becomes a constant offset when the sensitivity of the instrument starts to change. The cut off is not exactly equal to the threshold set in the configuration (in this case 500 units), but lower, because the filter looks 10 days before and 10 days after the date when SL  $R6$  is calculated. If the cut off remains constant, it means that the last calculated correction which passes through rejection criteria, is taken into account, the same situation is experienced when there is no valid SL test (Stanek personal communication, 2018). Consequently, the temporal behaviour of  $R6_{smooth}$  during these time intervals appears as a plateau. In this case SL correction is not applied since it is too high. Once a new calibration is performed (i.e. new references of  $R6$  and the ETC are defined)  $R6$  and  $R6_{smooth}$  show a similar behaviour again.*

**Figure 2 lower panel I assume the  $R6$  presented in the figure 2 are daily averages. I am not sure though. I am just wondering how many sl-tests there were when such spikes appear.**

It was specified that: *It is worth noticing that the number of standard lamp test per day is on average from 4 to 6 at Rome, and from 2 to 4 in winter and from 8 to 10 in summer at Aosta and that only the daily means of BPS correction and  $R6_{smooth}$  are stored. The latter is calculated if at least one standard lamp test is performed.*

**I think it is a bit weird that the algorithm (BPS) has been made to pick up spikes so easily and use that to mistake them as valid  $r6$  measurements. However I am also surprised that the results may be better than with the other software during those spikes.**

That's true  $R6_{BPS}$  follows the behaviour of  $R6$  even during the spikes.

**There should be information of standard lamp changes also. Or maybe they were changed only at calibration. Usually drifts like in Rome 2006 are caused by lamp being at the end of its lifetime but when looking at the corrected data it is apparent that the spectral response of the instrument really changed that dramatically and thus R6smooth can not follow the changes. Changes this big are rare and probably it should be considered alarming sign if R6 changes more than the threshold of O3Brewer?**

We described in Section 3.1 the analysis conducted in when differences between BPS and O3Brewer ozone data exceed more than the DS accuracy: 1. R6BPS lower than R6smooth, 2. R6BPS higher than R6smooth, 3. R6BPS similar to R6smooth

**Figure 3 Could you address the amount of ozone difference because of difference in SL R6? Maybe not change these figures but in addition to this information. Just take the standard lamp part of equation (5).**

In the new section 3.1 the following information was added:

*Slight ozone difference took place when R6BPS was lower than R6smooth (at least 100 units), then the difference in ozone daily means was between -3% and 21% and in case of individual values from -3% up to 27 %, at Rome. At Aosta there was only one episode (2011/6/18) in which the O3Brewer daily mean differed about 30% from BPS determined.*

.....

*Large negative ozone differences occur when R6<sub>BPS</sub> is higher than R6<sub>smooth</sub> (at least >100 units). This causes a variation between the daily means generated by the codes from -5% till -50% at Rome and from -51% till -91% at Aosta: Considering individual values a mean percentage difference between -3.1% and -57% was found at Rome, and of the same magnitude as that of daily means at Aosta.*

**line 399 I think the sl-corredction should be used especially on those days because the etc has dramatically changed. Now the O3Brewer with its cut-off does not follow the changes and the result of this is seen in figure 1 where O3Brewer data is very different than other around 2006-2007. Now if this change in r6 would have been because of a rapidly changing lamp irradiance then these values of r6 should not be used.**

We did not use data belonging to periods in which R6 produced drift or spikes, in the comparison with EUBREWNET, OMI and in the trend analysis.

**line 400-402 Many of these other reasons can be checked from the raw files. I think anomalous R6 values should not be used in processing the data. Smoothing filter somewhat helps avoid these spikes. I think O3Brewer might do well if there was no cut off at 500 units (or whatever the cut off is).**

In the last version of O3Brewer used for this revised analysis, the standard lamp maximum for applying of ETC correction from SL test results is configurable. We used first the default limit of 500 units for the difference between R6 and the reference R6ref. instrumental Then, we processed Rome ozone data using O3Brewer by setting the SL maximal limit to higher value to assess whether the smooth correction can properly process ozone data when large changes occurred in the response. The SL maximal correction limit was to 3000 units keeping identical conditions for the air mass and the standard deviation of the previous processing. This was still explained in the new section 3.1

**line 406 Why? No other sources of disparity between the software are really addressed than R6. Does it explain all the differences? It is stated that there are discrepancies in "good data" also but no explanation or theory or a guess what would be the reason. There should be a case study of good measurements that differ greatly to address other sources of differences.**

Another source of discrepancy was addressed which occurred when R6BPS similar to R6smooth. This case was analysed in Section 3.1 :

*A different number of observations can be taken into account in the determination of the daily means by the two codes generating differences that can be significant in some cases. Such difference can be due to the fact that there are no filter conditions on the minimum and the maximum ozone values calculated by O3Brewer. Consequently, the daily means generated by this software are determined including anomalous values.*

Two examples were provided:

*We showed individual ozone values generated by both codes on 23/06/2001 at Rome with a daily average of 335 DU for BPS and 375.4 DU for O3Brewer (Fig.11, upper panel). It is clearly visible that the high individual ozone value generated by O3Brewer (618.7 DU) affecting the daily average provided by this code. Another example is provided for Aosta (Fig. 11, lower panel). On 5/1/2010 the daily average is 323.5 DU for BPS whereas it is 208.4 DU for O3Brewer. It is found that very low ozone values generated by O3Brewer, not discarded in the determination of the daily means, affect the quality of its value.*

**line 486 and table 5 Does it makes sense to think about the change in RMSE in case of O3Brewer as it has been shown in figure 1 that in special cases it does not follow the changes in spectral sensitivity of the instrument correctly. Hopefully no one uses these software so loosely that they don't check their data in case of large drifts.**

The new Table 5 reports the summary of the statistics of the comparison between OMI and ground-based data taking into account only periods not belonging to the three cases analysed in Section 3.1

**line 491 It was stated earlier (page 12 line 298-) that the use of daily value is fine because ozone is so stable but here it is noted that it might have an effect.**

The phrase was cancelled

**line 501 The drift still needs to be quite fast and dramatic to exceed the O3Brewer threshold between two calibrations (1-2 years).**

The above issue was specified in the conclusions

**line 505 Which one is most "correct". Does the BPS not follow the outliers a bit too closely? Usually the spikes are false R6 and should not be followed. The spectral sensitivity of the instrument is not expected to chance rapidly back and forth. For sure in the case of drifts it is not a good option to do the O3Brewer way and cut off but on other cases I would not want to follow every bump and spike in the R6 data.**

The conclusion was modified as follows:

*When R6 exceed the default value of the cut off (550 units) set in the configuration of the O3Brewer software during an occasional spike, the correction is not applied, whereas the BPS correction does. This could generate false high/low ozone values. In latest version of O3Brewer it is possible to set the cut off to higher value that is useful when there a large R6 drift is experienced. However anomalous ozone values can be still observed, since in O3Brewer there are no filter conditions on the minimum and the maximum ozone values. Similarly, the current Level 1.5 in the EUBREWNET can produce erroneous ozone recalculations when anomalous R6 values are experienced. The issue is expected to be solved in Level 2.0 products, when they will be released. The BPS ozone recalculations seem to be less affected in the case of R6 drift. However when serious changes in the spectral sensitivity of instrument is experienced, a solution consists in*

dividing the periods of R6 drifts into shorter time intervals and for that period a new set of constants ( $R_{6,ref}$  and ETC) could be established by the user as the averages of R6 ratios in that time interval. This process ("synthetic calibration") allows the user to introduce standard lamp corrections larger than the software hardcoded thresholds. In any case the synthetic constants in use must be confirmed at the next calibration with the reference instrument.

*Here we decided to discard the periods with drifts or occasional abrupt changes in R6, and a good overall agreement is found between BPS, O3Brewer and EUBREWNET (MPE about <1%).*

.....

*As a final remark, it is important to underline that for sake of consistency and comparability between the results from different stations which send ozone products to international data centres such as WOUDC or others, it is important to know the processing software used to generate individual ozone values, the time behaviour of the instrumental stability, the method applied for the standard lamp correction as well as the adopted rejection criteria to determine the daily means.*

**line 515 I agree on the responsibility of the instrument operators. I also agree that there could be ways to work round some problems regarding to software behaviour. But also I think if there are behaviour in the instruments that the software dont handle well, the software should be changed accordingly if possible. I wonder if there was a way to get rid of the cut off in O3Brewer for the revised version.**

The following phrase was included in the conclusions

*When R6 exceed the default value of the cut off (550 units) set in the configuration of the O3Brewer software, the correction is not applied. In latest version of O3Brewer it is possible to set the cut off to higher value that is useful when there a large R6 drift is experienced. However anomalous ozone values can be still observed, since in O3Brewer there are no filter conditions on the minimum and the maximum ozone values.*

#### **Technical/typographical:**

All incorrect words and typos were changed and formatted in italics

**page 1 line 24 loose the parentheses, maybe "Italian stations Rome and Aosta"**

Done

**page 1 line 26 can you loose parentheses for example EUBREWNET level 1.5 product**

Done

**page 1 line 31 remove clearly and (as expected)**

Done

**page 3 line 60 This sentence should be rephrased. This sentence should be rephrased.**

**"Satellite... made by using the solar UV light backscatterd..."**

The statement was modified as: *Satellite-based ozone measurements are made by using the solar UV light backscattered from the Earth's atmosphere.*

**page 4 line 73 could this be rephrased to not use brackets**

The brackets were removed : *Even though all available processing software packages use the same TOC retrieval algorithm, which is based on the Bouguer-Lambert-Beer law, slightly different implementation can trigger some differences in the processed TOC data.*

**page 4 line 74 implementation**

Done

**page 4 line 84 Brewers**

Done

**line 87 suggestion to lose the parenthesis and write ... packages: the Brewer Processing Software, hereafter called BPS,**

Done

**line 89 confirm title for Mr Stanek**

the title was modified in *Ing*

**line 90 inconsistent way of using parentheses inside a single sentence, could it "be EUBREWNET level 1.5 ozone product."**

Done

**line 94 to what extent**

Done

**line 95 change to "no other collocated TOC measurements were available" ? Somehow this sentence needs to be simplified**



The sentence was modified as: *The OMI data were used since no other collocated TOC measurements were available.*

**line 97 Paragraph starting here could be rewritten so that there are full stops between the sentences. The information is there but somehow the structure makes it hard to read.**

We re-wrote the paragraph:

*This paper is structured as follows: Section 2.1 briefly describes the theory on the ozone estimates from Brewer direct sun (DS) measurements. In Section 2.3, the procedure used by three software packages to process ozone data is presented. Section 2.4 describes the Brewer stations under study. Section 3 is dedicated to the comparison among the three TOC data retrievals and to understand the causes responsible for the differences among processed ozone values. Additional comparison between ground-based data and OMI products is also carried out. Ozone trends are estimated to investigate if using specific software could affect the results. Finally, conclusions are drawn in the last section.*

**line 107 suggest to leave out the (DS) from the header and introduce it in the text and "... spectrophotometer"**

Done

**line 110 is this a paragraph change or not?**

It was changed

**line 169 suggest change to "time series of the internal standard lamp tests, described in the following section."**

Done

**line 180 "to verify that"**

Done

**line 181 "and to follow the changes" (probably you can not really control them too much)**

we replaced with *to track*

**line 185 rephrase so there is no need for brackets, and "using an internal 20 W quartz-halogen lamp as the light source"**

done

**line 187-188 Rephrase so there is no need for parentheses.**

here the rephrased statement *The DT test measures the dead-time of the photomultiplier and the photon-counting circuitry and the result of the test value should be within 5 ns with respect to the instrument constant. Also during the DT test, the halogen lamp is turned on.*

**line 189 rephrase so there is no need for parentheses. Maybe give hg test its own paragraph?**

here the rephrased statement: *For the Hg test a mercury lamp is used. This test ensures the correct wavelength alignment of the Brewer due to the internal temperature changes.*

**line 195 no need to repeat the lamp power in my opinion, suggest to change "is performed using the internal quartz-halogen lamp as the light source"**

done

**line 198 rephrase so you can lose the parentheses**

here the rephrased statement: *In this way changes with respect to  $R6_{ref}$  are constantly tracked.*

**line 201 rephrase to lose the parentheses**

here the rephrased statement: *If a change in  $R6$  is experienced, this results in a corresponding change in the ETC assuming that the relative lamp intensities at the four wavelengths do not change. Consequently, a correction in the reference ETC should be applied to determine the ozone values in between each calibration, .....*

**line 227 suggest to start sentence with "Level 1.5 total ozone column data were..."**

Done

**line 278 "stray light"**

Done

**line 280 "is not available" to "was not available"**

Done

**line 307 "The Aura satellite describes a..." to "The Aura satellite travels in a..."**

Done

**line 308 suggest to start a new paragraph from "Two algorithms..."**

Done

**line 313 Could this be simplified to something like: "Here we used OMI-TOMS because it has been shown to have a better agreement with the ground based Brewer and Dobson instruments. (Balis et al., 2007)" ?**

Done

**line 323 Mean Bias says bias already so "(or bias)" is not needed**

Done

**line 439 missing a full stop.**

Done

**line 462 This should be stated in the caption of the picture!**

New figures were included

**figure 5 More detailed caption needed! What are the panels? It was actually in the text but the caption needs to be more detailed.**

In the new Figure 5 (now Fig.16) more information was added.

**line 472 rephrase to loose the parentheses**

We calculated the scaled correlation coefficient as suggested by referee 2 so the following statement was included.

*In general, the scaled correlation is, for both sites, on average  $RHOs = 0.8$  which represents how the series are well connected in the short term.*

**line 476 A bit confusing way to put a sentence together. Also, can it be "about less than 1%"? It is either less than 1% or about 1%.**

*OMI products show a systematic underestimation with respect to ground-based data. At Rome satellite data are less than 1 % for both O3Brewer and EUBREWNET whereas at Aosta about 2.5%; 1.2% (Rome) and 2.5% (Aosta) in the case of BPS data.*

### 3. RESULTS AND DISCUSSION

The time series of TOC daily means generated by BPS, O3Brewer and calculated by EUBREWNET individual ozone values, are presented in Figs. 1 (upper panel Rome, lower panel Aosta). *Individual measurements are distinctly plotted for each site in Fig.2 and Fig.3.*

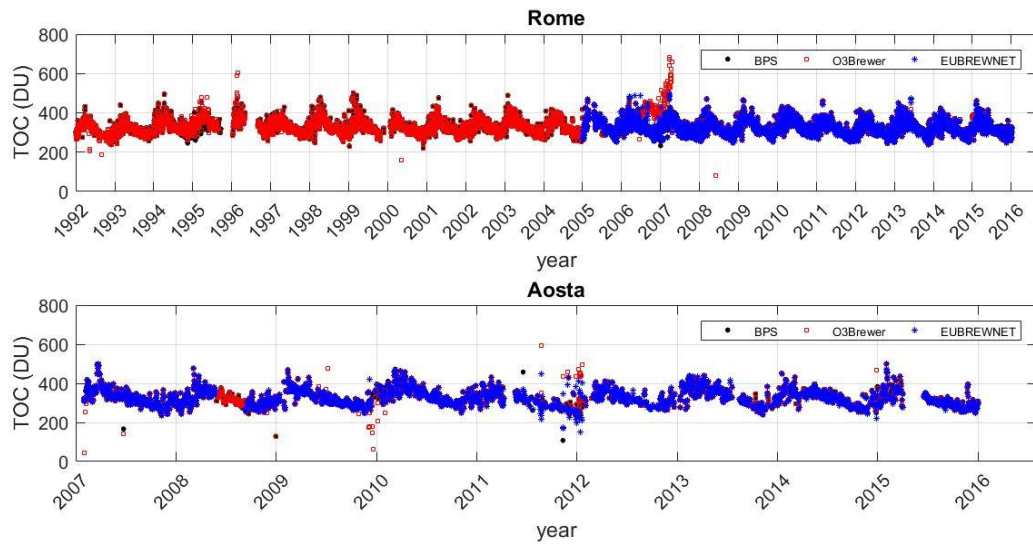

**Figure 1.** Time series of TOC daily means from BPS (black), O3Brewer (red) and EUBREWNET (blue) at Rome (upper panel) and at Aosta (lower panel). *At Aosta the EUBREWNET L1.5 ozone values were not generated between May 24 and September 8, 2008, because the standard lamp got burned out since May 2008 and was replaced in September 2008.*

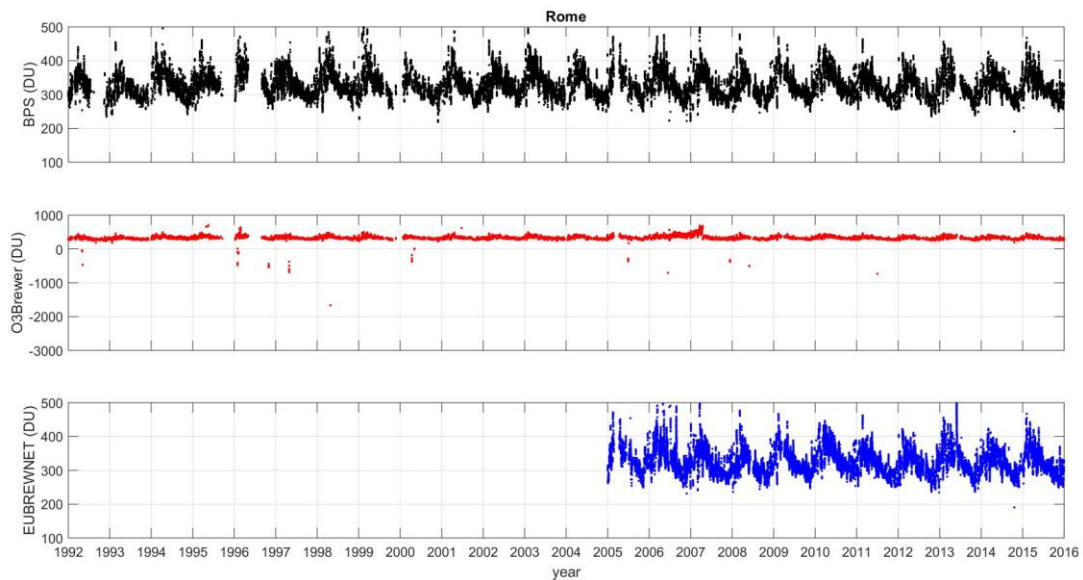

**Figure 2.** Individual TOC values generated by BPS (black), O3Brewer (red) and EUBREWNET (blue) at Rome.

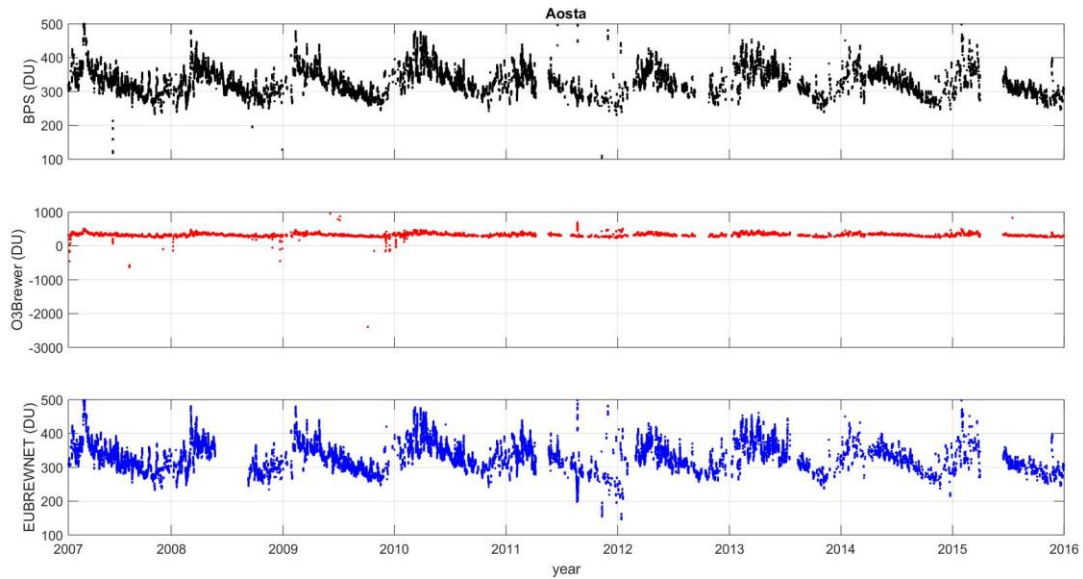

**Figure 3.** Individual TOC values generated by BPS (black), O3Brewer (red) and EUBREWNET (blue) at Aosta.

It is worth noticing that ozone seasonal cycles show an overall similarity between the two sites with maximum value in late spring and minimum in late autumn, both on daily means and on individual ozone series. The seasonal behaviour of O3Brewer is not easily distinguishable since the y-axis range has flattened it due to negative recalculated ozone values. However it is clearly visible that there are some periods in which TOC daily means *as well as individual measurements obtained by the three processing software, are different* (mainly between 2006 and 2007 at Rome and at the end of 2011 at Aosta).

In order to understand *where the differences come from*, we first analysed both *individual TOC observations and the resulting daily values processed by BPS and O3Brewer*. Afterwards we compared both TOC retrievals with EUBREWNET data. Finally, the processed Brewer data were compared with OMI products.

### 3.1 Comparison between BPS and O3Brewer TOC retrievals

*Fig. 4 shows the temporal behaviour of the ozone differences between BPS and O3Brewer taking into account both daily means whereas Fig. 5 shows individual values. It can be noticed that in several cases the large differences can be attributed to wrong negative ozone recalculations by O3Brewer as also shown in Fig. 2 and 3. The minimum and maximum differences in the daily means are -278.1 DU and 567.9 DU at Rome, -332.3 DU and 532.0 DU at*

Aosta, respectively. The differences between BPS and O3Brewer individual ozone values range from a minimum of -304.4 DU to a maximum of 90.6 DU at Rome, from -435.6 DU to -157.7 DU at Aosta.

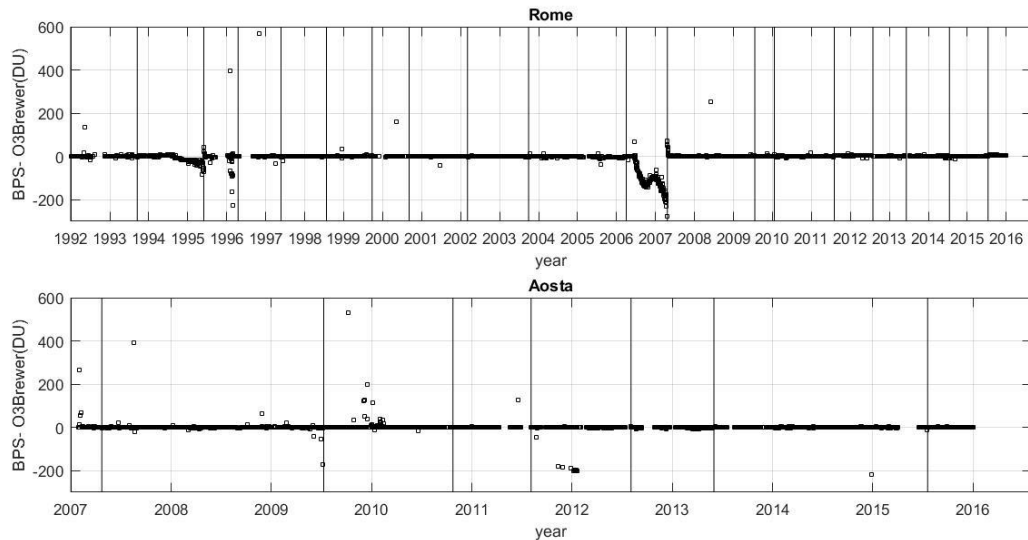

**Figure 4.** Time plot of the differences between BPS and O3Brewer daily means at Rome (upper panel) and at Aosta (bottom panel). Vertical lines represent the date of the calibration campaigns.

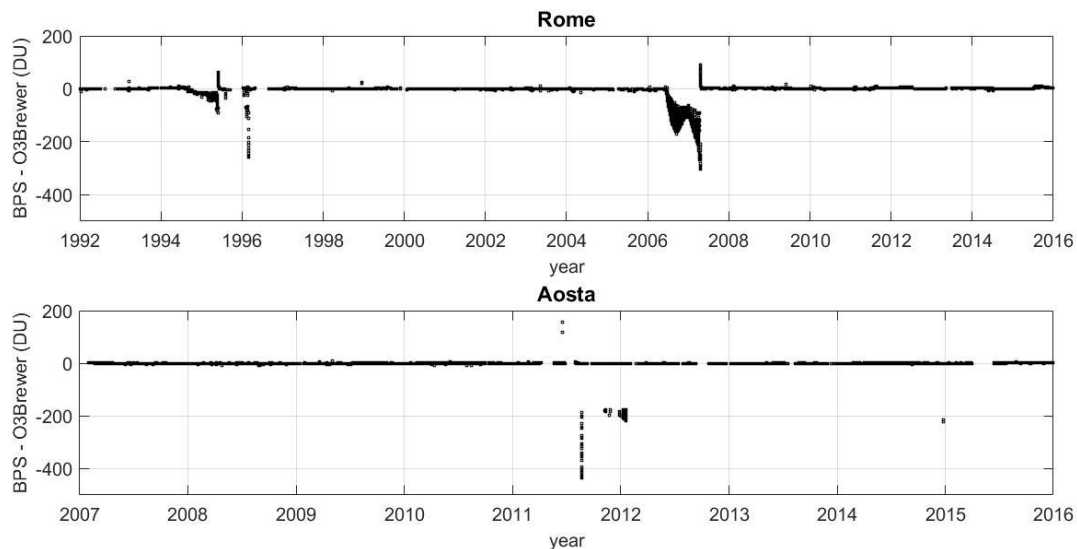

**Figure 5.** Time plot of the differences between BPS and O3Brewer individual ozone data at Rome (upper panel) and at Aosta (bottom panel).

With the aim to understand where the differences among the TOC retrievals come from, we took into consideration the spectral sensitivity of both Brewer instruments through the R6 ratio time behaviour (Fig. 6). In the same figure it is also plotted how each software ( $R6_{BPS}$  and  $R6_{smooth}$ ) tracks changes in the spectral sensitivity of the instrument.  $R6_{BPS}$  is obtained as the sum of BPS correction and  $R6_{ref}$ .  $R6_{ref}$  values established during the calibration campaigns are also plotted. It is worth noticing that the number of standard lamp test per day is on average from 4 to



6 at Rome, and from 2 to 4 in winter and from 8 to 10 in summer at Aosta and that only the daily means of BPS correction and  $R6_{smooth}$  are stored. The latter is calculated if at least one standard lamp test is performed.

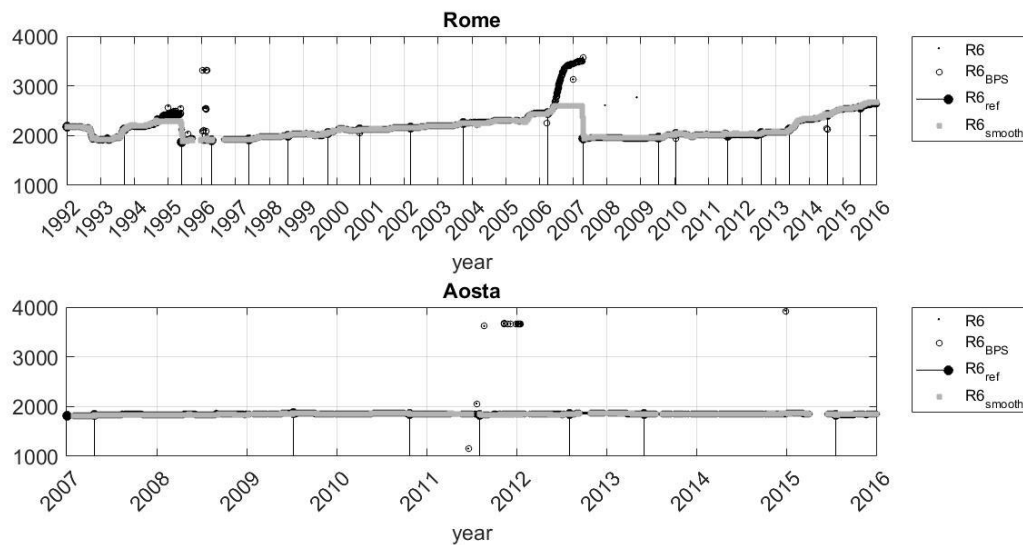

**Figure 6.** Daily series of the ratios  $R6$ ,  $R6_{BPS}$  and  $R6_{smooth}$  at Rome (upper panel) and at Aosta (bottom panel). Vertical lines represent  $R6_{ref}$  established during each calibration campaign.

Looking at  $R6$  behaviour (Fig. 6 upper panel), it can be noticed that the sensitivity of the instrument at Rome has changed mainly in two periods (between 1994 and 1995, and between 2006 and 2007).  $R6_{smooth}$  becomes a constant offset when the sensitivity of the instrument starts to change. The cut off is not exactly equal to the threshold set in the configuration (in this case 500 units), but lower, because the filter looks 10 days before and 10 days after the date when SL  $R6$  is calculated. If the cut off remains constant, it means that the last calculated correction which passes through rejection criteria, is taken into account, the same situation is experienced when there is no valid SL test (Stanek personal communication, 2018). Consequently, the temporal behaviour of  $R6_{smooth}$  during these time intervals appears as a plateau. In this case SL correction is not applied since it is too high. Once a new calibration is performed (i.e. new references of  $R6$  and the ETC are defined)  $R6$  and  $R6_{smooth}$  show a similar behaviour again.

Brewer 066 (Aosta) exhibited a better stability except for some  $R6$  spikes (Fig. 6, bottom panel) whereas  $R6_{smooth}$  time series shows a stable behaviour with respect to  $R6$ .  $R6_{BPS}$  shows a similar behaviour to  $R6$  at both stations due to the calculation method of the standard lamp correction by the BPS.

A better visualization of the effect of the correction factor on TOCs is provided plotting the difference between the TOC daily means (BPS – O3Brewer) as a function of the difference between  $R6_{BPS}$  and  $R6_{smooth}$  (Fig. 7). Large deviations between the two reprocessed TOC daily

means appear when there is a large difference between  $R6_{BPS}$  and  $R6_{smooth}$ . However large differences occur even if  $R6_{BPS}$  does not differ too much from  $R6_{smooth}$ .

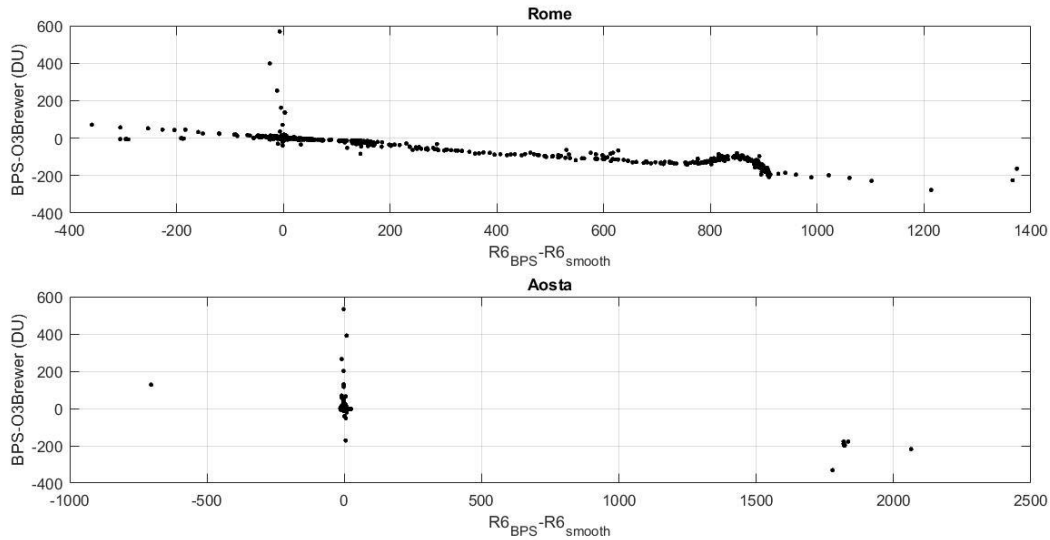

**Figure 7.** Differences between BPS and O3Brewer TOC daily means vs  $R6_{BPS}-R6_{smooth}$  at Rome (upper panel) and at Aosta (bottom panel).

Three circumstances are here analysed when differences between BPS and O3Brewer ozone data exceed more than the DS accuracy: 1.  $R6_{BPS}$  lower than  $R6_{smooth}$ , 2.  $R6_{BPS}$  higher than  $R6_{smooth}$ , 3.  $R6_{BPS}$  similar to  $R6_{smooth}$

1.  $R6_{BPS}$  lower than  $R6_{smooth}$ .

Slight ozone difference took place when  $R6_{BPS}$  was lower than  $R6_{smooth}$  (at least 100 units), then the difference in ozone daily means was between -3% and 21% and in case of individual values from -3% up to 27%, at Rome. At Aosta there was only one episode (2011/6/18) in which the O3Brewer daily mean differed about 30% from BPS determined. In that case, O3Brewer average was derived by three individual ozone values that showed the same difference with respect to BPS ones. In this case a large negative correction was applied to ozone values generating a false high ozone case. The spike in the R6 value was originated by the two wrong SL test carried in that day caused perhaps by the micrometer in a wrong position, noisy communication, incorrect zenith drive position in relation to the lamp, or signals that is at the end of its lifetime. Occasional very large/low R6 values can be due when SL lamp is ready to burn out, however it does not occur in this case. Consequently, the negative BPS correction generated a

high ozone values with a large standard deviation, whereas  $R6_{smooth}$  was not applied to individual TOC data that resulted consistent with ozone values before and after that date.

At Rome the conditions in which  $R6_{BPS}$  was lower than  $R6_{smooth}$  occurred during the calibrations in 1995, 2006, 2007 and 2014. The discrepancy between the two codes could have been caused by the offset introduced by the way BPS determines the  $R6$  reference value as for the other code the  $R6_{ref}$  is obtained during the calibration campaign and set manually in the configuration. The BPS  $R6_{ref}$  is computed with a triangular smoothing filter of SL-test over the 15 day period after the calibration and it is calculated "on fly" from daily mean SL values and it is not stored (Fioletov, personal communication 2018).

To look into the possible effect of the BPS offset we estimated  $R6_{ref\_BPS}$ , for each day over the 15 days after the calibration by subtracting the correction (reported in the file *o3data.txt*) to the corresponding  $R6$  value. Then the average over the 15  $R6_{ref\_BPS}$  values was compared with  $R6_{ref}$  (given by hand after the calibration). The estimated offset introduced by BPS with respect to  $R6_{ref}$  is very small, ranging between -19 to 6 units at Rome and between -10 to 2 units at Aosta. Consequently the BPS offset appears not to be responsible for the ozone difference that can be attributed to the calculation method of the standard lamp correction.

## 2. $R6_{BPS}$ higher than $R6_{smooth}$

Large negative ozone differences occur when  $R6_{BPS}$  is higher than  $R6_{smooth}$  (at least  $>100$  units). This causes a variation between the daily means generated by the codes from -5% till -50% at Rome and from -51% till -91% at Aosta: Considering individual values a mean percentage difference between -3.1% and -57% was found at Rome, and of the same magnitude as that of daily means at Aosta.

Two long periods were found at Rome belonging to this condition (29<sup>st</sup> October 1994 - 5<sup>th</sup> May 1995; 26<sup>th</sup> June 2006 - 16<sup>th</sup> April 2007). The large drift in  $R6$  turned out to be the deterioration of the filter ( $NiSO_4/UG11$ ) which was replaced during the calibration visits both in 1995 and 2007. In both cases it can be observed the cut off in  $R6_{smooth}$  and hence the O3Brewer recalculation provides uncommon TOC values. Then, we processed Rome ozone data using O3Brewer by setting the SL maximal limit to higher value to assess whether the smooth correction can properly process ozone data when large changes occurred in the instrumental response. The SL maximal correction limit was to 3000 units keeping identical conditions for the air mass and the standard deviation of the previous processing. In addition a further ozone processing was carried out by switching off the smoothing filter. Fig. 8 shows the time series of the ratios  $R6$ ,

$R6_{BPS}$  and  $R6_{smooth}$  (setting the limit to 3000 units) at Rome. It can be noticed that the  $R6_{smooth}$  has now similar behaviour as  $R6_{BPS}$ , nevertheless in some circumstances its behaviour is noisier than both  $R6_{smooth}$  (setting the limit to 500 units) and  $R6_{BPS}$ .

Fig.9 shows individual TOC data processed by O3Brewer 1) without applying the smoothing filter, 2) with the SL limit correction set to 500 and 3) with the SL limit correction set to 3000 units over the period of the R6 drift (2006-2007) at Rome. In the same figure individual BPS recalculations without modifying the set up are also plotted.

A better agreement with BPS ozone data is visible when ozone data were processed without the smoothing filter and with higher cut off in R6, however there are still anomalous ozone values due SL correction, whereas ozone values calculated without the correction seem not be not affected.

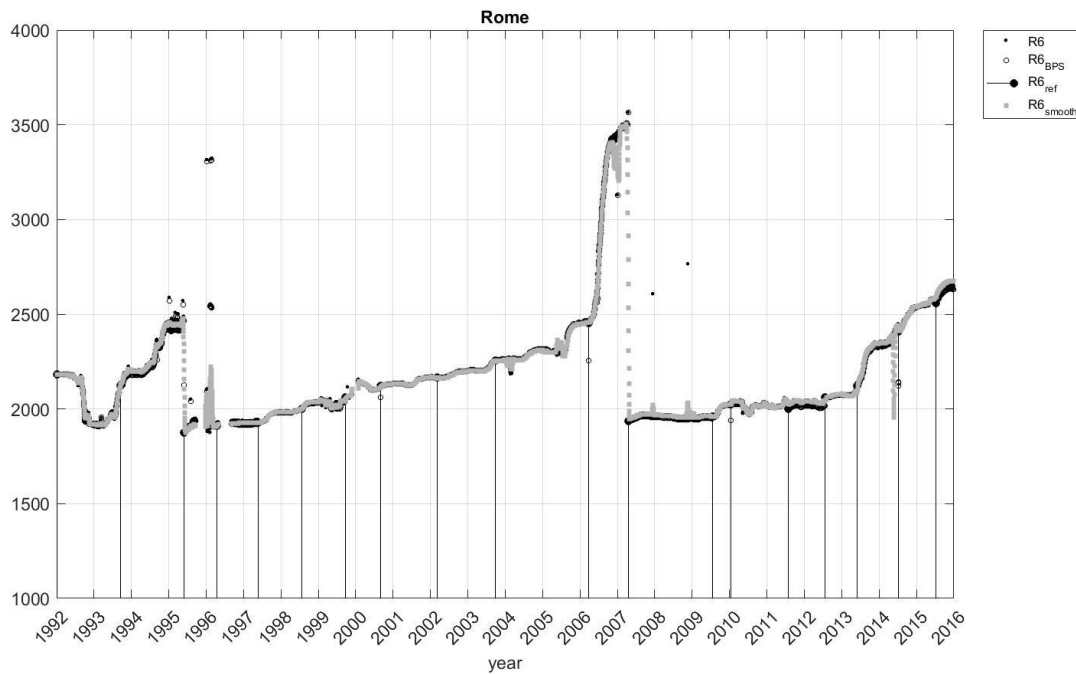

**Figure 8.** Daily series of the ratios  $R6$ ,  $R6_{BPS}$  and  $R6_{smooth}$  at Rome. Vertical lines represent  $R6_{ref}$  established during each calibration campaign.

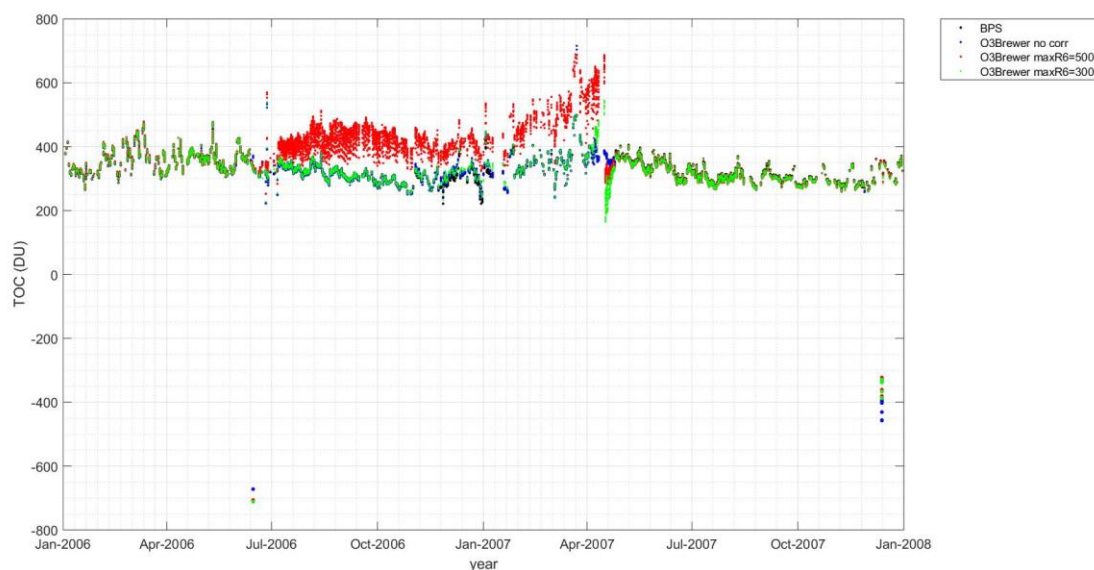

**Figure 9.** Individual ozone values calculated by the BPS (black), O3Brewer without the filter smoothing correction (blue), O3Brewer with the cut off at 500 units (red), O3Brewer with the cut off at 3000 units (green) over the period of the drift in 2006 -2007 at Rome.

The occasional anomalous R6 ratios occurred at Aosta, most of them in 2011 and at the beginning of 2012. Wrong wavelength selection by the micrometer, communication problems or incorrect zenith drive position in relation to the lamp could have caused the R6 spikes. In this case the algorithm of O3Brewer (with the cut off at 500 units) did not follow the abrupt change. The correction was not applied resulting in large over- or under-estimation of TOC or with uncertain data quality.

### 3. $R6_{BPS}$ similar to $R6_{smooth}$

A different number of observations can be taken into account in the determination of the daily means by the two codes generating differences that can be significant in some cases. The total number of individual calculated total ozone values by O3Brewer is 104666 at Rome and 50088 at Aosta, the number of those calculated by BPS is 100352 at Rome and 46617 at Aosta. Fig. 10 shows the number of individual ozone values calculated by O3Brewer which is, in some days, higher than that of BPS.

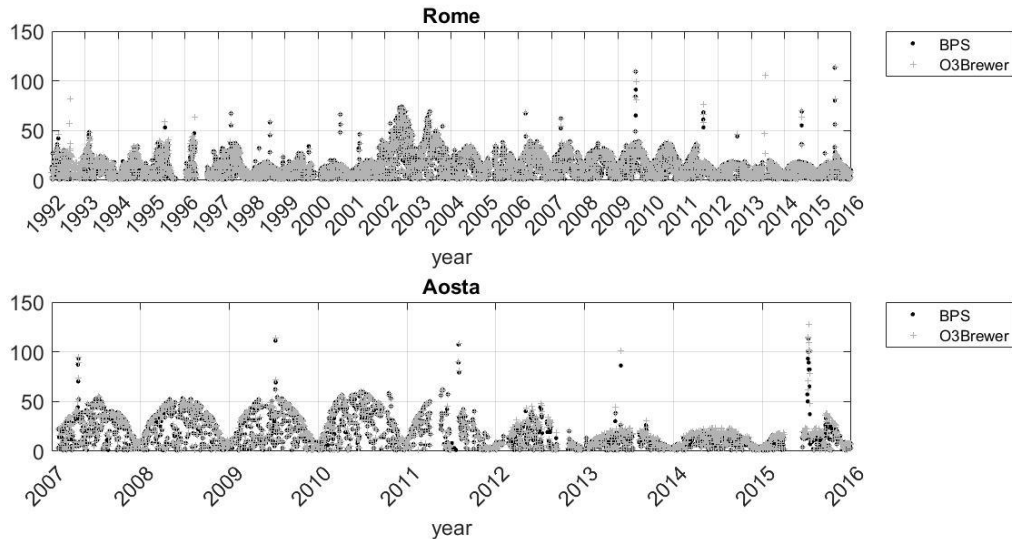

**Figure 10.** Time plot of the number of individual ozone values per day.

Such difference can be due to the fact that there are no filter conditions on the minimum and the maximum ozone values calculated by O3Brewer. Consequently, the daily means generated by this software are determined including anomalous values. The case of  $R6_{BPS}$  similar to  $R6_{smooth}$  responsible for significant ozone differences in the daily means ( $>5\%$ ) falls in this conditions.

As a specific example of the above case, we showed individual ozone values generated by both codes on 23/06/2001 at Rome with a daily average of 335 DU for BPS and 375.4 DU for O3Brewer (Fig.11, upper panel). It is clearly visible that the high individual ozone value generated by O3Brewer (618.7 DU) affecting the daily average provided by this code. Another example is provided for Aosta (Fig. 11, lower panel). On 5/1/2010 the daily average is 323.5 DU for BPS whereas it is 208.4 DU for O3Brewer. It is found that very low ozone values generated by O3Brewer, not discarded in the determination of the daily means, affect the quality of its value.



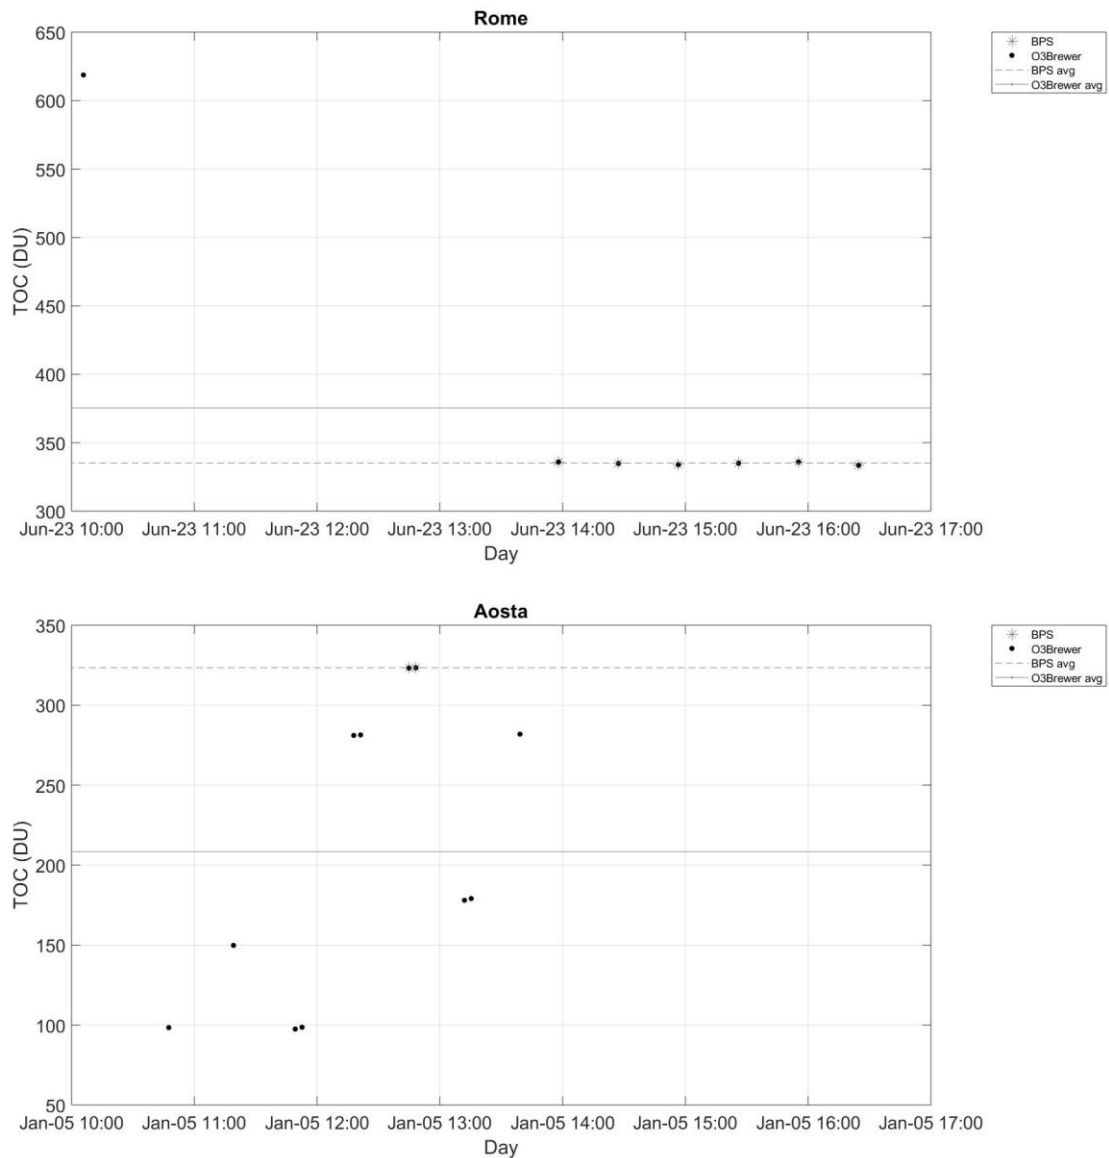

**Figure 11.** Individual TOC values generated by BPS and O3Brewer on 23/06/2001 at Rome (upper panel) and on 5/1/2010 at Aosta (bottom panel) taken as examples where large difference between occurred although the SL correction is similar. Horizontal lines (dashed for BPS; solid for O3Brewer) represent the daily average (avg).

Table 3 shows the statistical comparison between O3Brewer (with cut off at 500 units) and BPS individual data and daily means, after data belonging to three groups described in the previous section, have been discarded. TOC data without R6 values (no SL test was performed in that day) were also discarded. The temporal behaviour of the differences between O3Brewer and BPS individual calculated ozone values, are plotted in Figure 12 showing a variability in general within  $\pm 25$  DU at Rome and  $\pm 10$  DU at Aosta.

A good overall agreement is found both on individual values and daily means when data belonging to the above conditions were removed, the correlation is close the unity at both stations; MPE is not significant on both individual values and daily means at Rome as well as at Aosta.

**Table 3.** Summary of the statistics O3Brewer vs BPS at both sites ( $N$ = number of data;  $RHO$ = Spearman correlation;  $MB$  =Mean Bias,  $MPE$ =Mean Percentage Error,  $RMSE$  =Root Mean Square Error, the uncertainty of  $MB$  and  $MPE$  is characterized by the standard deviation).

| O3Brewer_vs_BPS   | $N$   | $RHO$ | $MB$ (DU)         | $MPE$ (%)         | $RMSE$ (DU) |
|-------------------|-------|-------|-------------------|-------------------|-------------|
| <b>Rome</b>       |       |       |                   |                   |             |
| Individual values | 89273 | 0.997 | $-0.6 \pm 2.1$    | $-0.2 \pm 0.7$    | 2.18        |
| Daily averages    | 6304  | 0.997 | $-0.8 \pm 2.4$    | $-0.2 \pm 0.7$    | 2.47        |
| <b>Aosta</b>      |       |       |                   |                   |             |
| Individual values | 44117 | 0.999 | $0.1 \pm 0.8$     | $0.03 \pm 0.30$   | 0.83        |
| Daily averages    | 2381  | 0.999 | $0.004 \pm 1.700$ | $0.001 \pm 0.600$ | 1.70        |

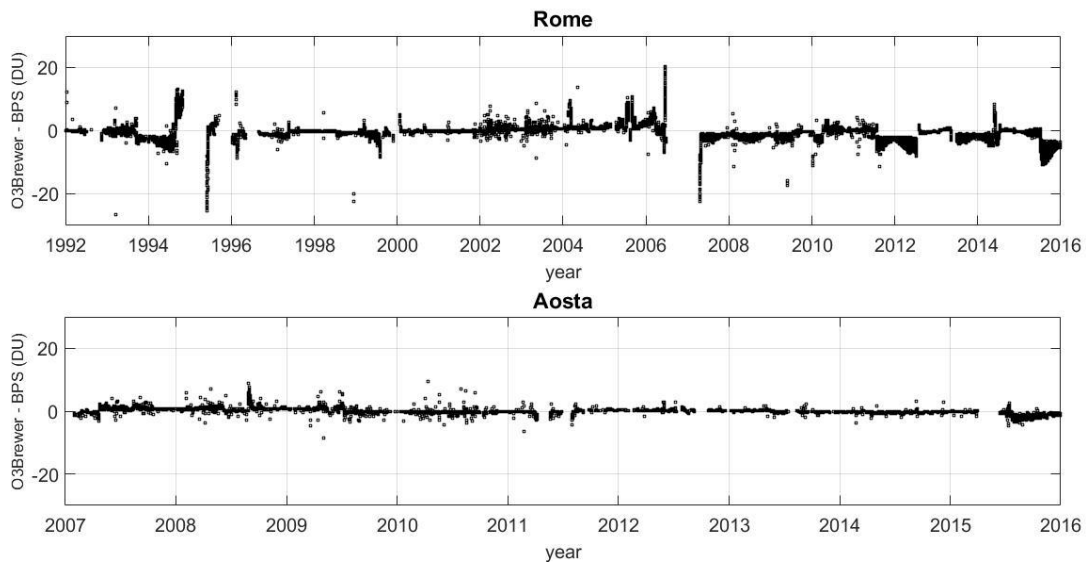

**Figure 12.** Difference between individual TOC values generated by BPS and O3Brewer at Rome (upper panel) and at Aosta (bottom panel) when anomalous values were discarded.

### 3.2 Comparison of BPS and O3Brewer TOC retrievals with EUBREUNET data

The TOC individual values and daily means retrieved by O3Brewer and BPS data were compared with those derived from EUBREUNET retrievals. The analysis was performed removing from the all series data belonging to the periods according to the three conditions analysed in the previous section.

Table 4 shows the statistical results of the two processed TOC data sets against the EUBREUNET data set. It was found that the difference among the TOC retrievals is less than 1%.

**Table 4.** Summary of the statistics O3Brewer vs BPS at both sites (N= number of data; RHO= Spearman correlation; MB =Mean Bias, MPE=Mean Percentage Error, RMSE =Root Mean Square Error, the uncertainty of MB and MPE is characterized by the standard deviation).

|                              | N     | RHO   | MB (DU)  | MPE (%)    | RMSE (DU) |
|------------------------------|-------|-------|----------|------------|-----------|
| <b>O3Brewer vs EUBREWNET</b> |       |       |          |            |           |
| <b>Rome</b>                  |       |       |          |            |           |
| Individual values            | 38227 | 0.996 | -0.2±3.8 | -0.05±1.00 | 3.80      |
| Daily averages               | 2972  | 0.996 | -0.1±4.6 | -0.02±1.20 | 4.60      |
| <b>Aosta</b>                 |       |       |          |            |           |
| Individual values            | 35746 | 0.997 | 0.3±5.3  | 0.2±2.4    | 5.33      |
| Daily averages               | 2186  | 0.994 | 0.5±7.6  | 0.2±3.2    | 7.76      |
| <b>BPS vs EUBREWNET</b>      |       |       |          |            |           |
| <b>Rome</b>                  |       |       |          |            |           |
| Individual values            | 38227 | 0.995 | 1.0±4.1  | 0.3±1.1    | 4.27      |
| Daily averages               | 2972  | 0.995 | 1.2±5.0  | 0.4±1.3    | 5.11      |
| <b>Aosta</b>                 |       |       |          |            |           |
| Individual values            | 35746 | 0.997 | 0.2±5.3  | 0.1±2.4    | 5.34      |
| Daily averages               | 2186  | 0.994 | 0.5±7.6  | 0.2±3.2    | 7.59      |

However looking at Figs. 13-14 the differences among the individual ozone values between BPS and EUBREWNET (Fig.13) and, between O3Brewer and EUBREWNET (Fig.14) are in some cases relevant. It seems that problems of the standard lamp values not filtered properly by the currently applied 7-days window smoothing, generate results less reliable (see the temporal behaviour of  $R6_{EUBREWNET}$  in Fig.15). This problem could be solved in the level 2 data in which the setting a filter in the R6 values and smoothing the R6 time series is planned to be taken into account in the EUBREWNET algorithm (Fountoulakis, personal communication 2018). However, although these options exist in the configuration form they are still inactive.

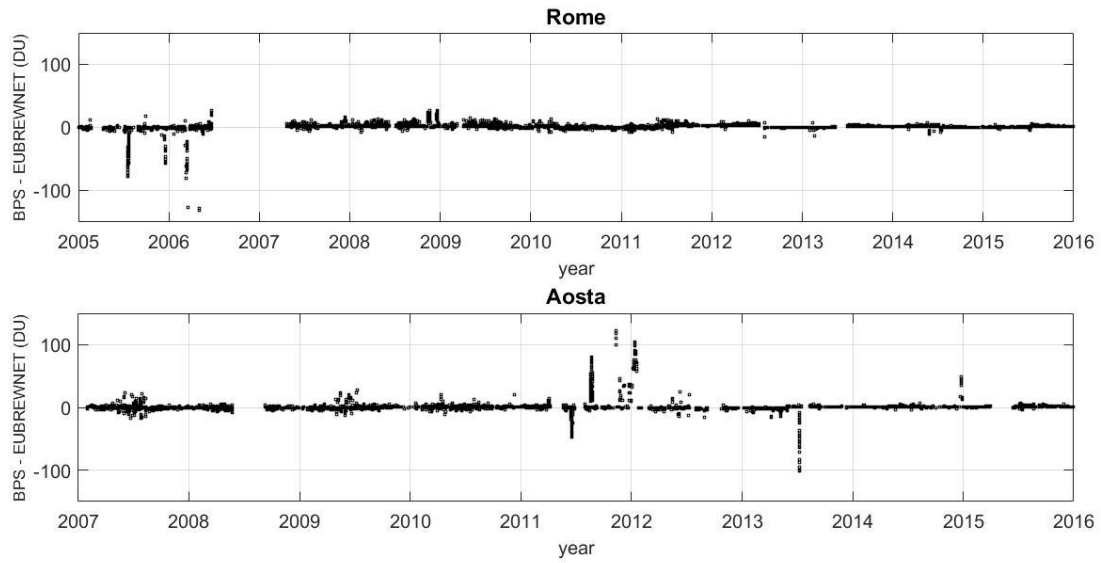

**Figure 13.** Difference between individual TOC values generated by BPS and EUBREWNET (Rome upper panel and Aosta lower panel).

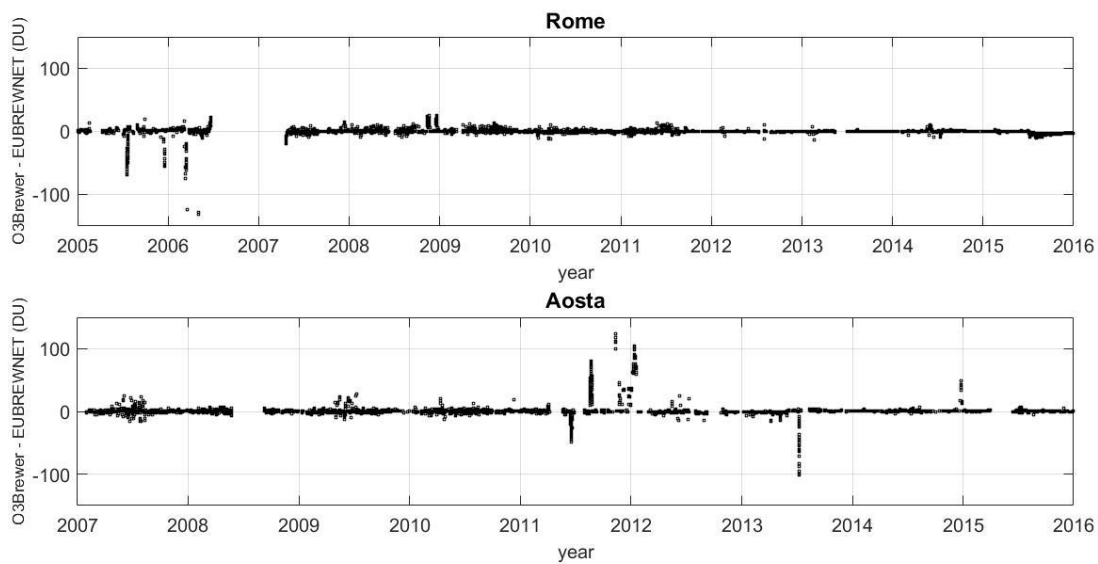

**Figure 14.** Difference between individual TOC values generated by O3Brewer and EUBREWNET (Rome upper panel and Aosta lower panels).

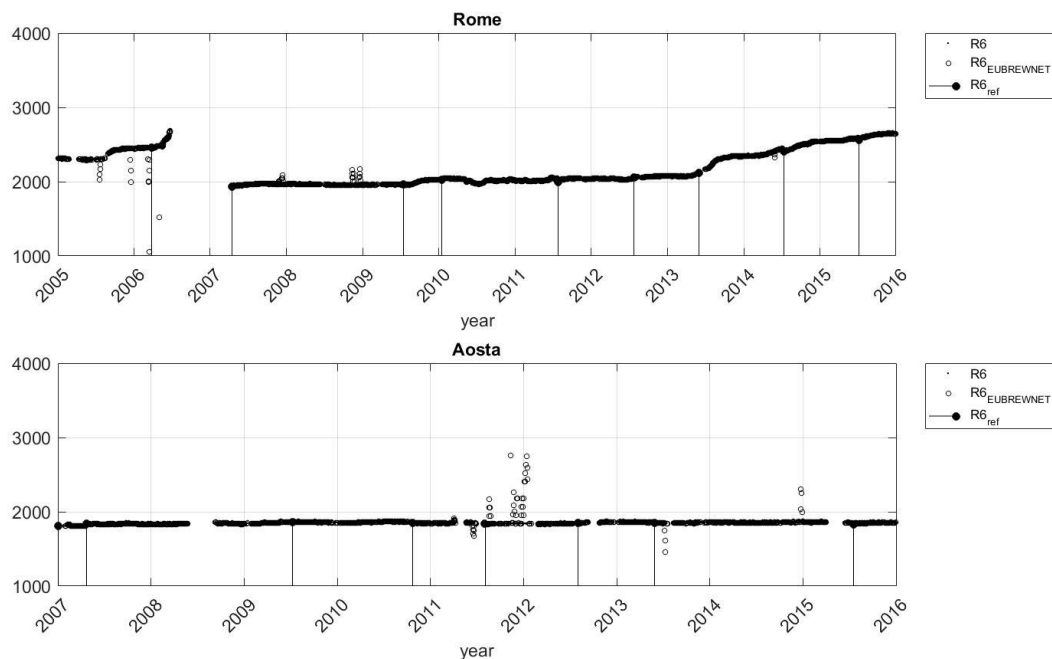

**Figure 15.** Daily series of the ratios  $R6$ ,  $R6_{EUBREWNET}$  at Rome (upper panel) and at Aosta (lower panel). Periods with the  $R6$  drift or spikes were removed. Vertical lines represent  $R6_{ref}$  established during each calibration campaign.

### 3.3 Comparison of BPS, O3Brewer and EUBREWNET TOC retrievals with OMI data

OMI overpasses were also compared with the processed Brewer TOC retrievals. The comparison was performed taking into account the same design criteria described in the previous session. The scatterplots of OMI vs Brewer data are shown in Fig. 16. However depending on the Brewer processing software a different behaviour is visible, even when only “good” data are considered. It can be observed that EUBREWNET data show larger deviations from the bisectrix with respect to the other retrievals.

The results of the statistical analysis are summarized in Table 5. *In general, the scaled correlation is, for both sites, on average  $RHOs = 0.8$  which represents how the series are well connected in the short term.*

OMI products show a systematic underestimation with respect to ground-based data. *At Rome satellite data are less than 1 % for both O3Brewer and EUBREWNET whereas at Aosta about 2.5%; 1.2% (Rome) and 2.5% (Aosta) in the case of BPS data.* These results are in agreement with previous studies on validation of the OMI total ozone column by Brewer spectrophotometry conducted at the same latitudes (Ialongo et al., 2008; Anton et al., 2009).

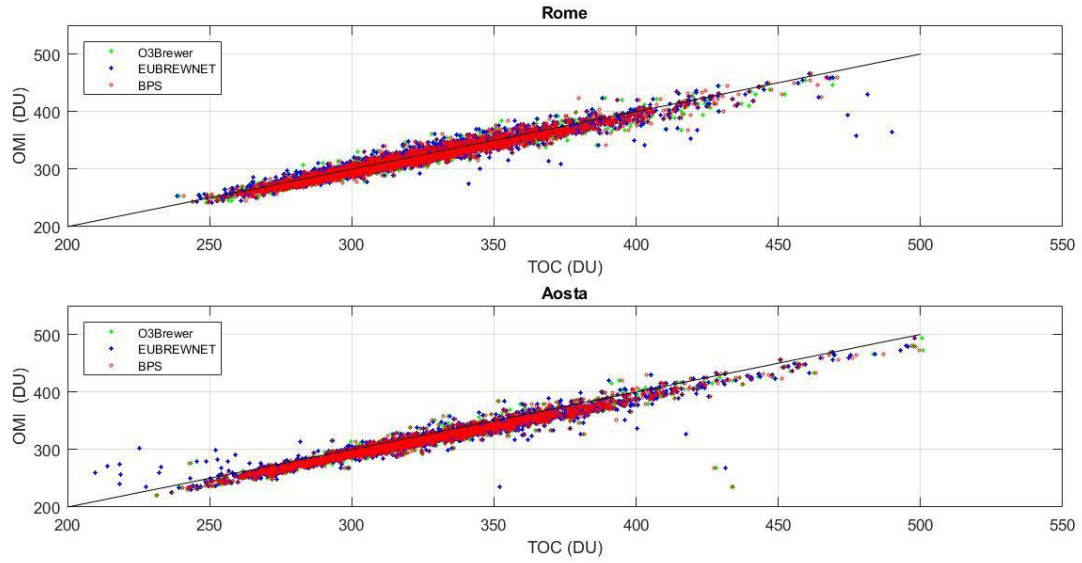

**Figure 16.** Scatterplots OMI versus Brewer total ozone column at Rome (upper panel) and Aosta (lower panel). The solid line represents the bisectrix, The comparison is carried out with O3Brewer (green), EUBREWNET (blue) and BPS (red) data.

**Table 5.** Summary of the statistics of the comparison between OMI versus BPS, O3Brewer and EUBREWNET (N= number of data; RHOs= Spearman scaled correlation; MB =Mean Bias, MPE=Mean Percentage Error, RMSE =Root Mean Square Error, the uncertainty of MB and MPE is characterized by the standard deviation).

| Rome                    | N    | RHOs  | MB (DU)  | MPE (%)  | RMSE (DU) | Aosta | N    | RHOs  | MB (DU))  | MPE (%)  | RMSE (DU) |
|-------------------------|------|-------|----------|----------|-----------|-------|------|-------|-----------|----------|-----------|
| <b>OMI vs BPS</b>       |      |       |          |          |           |       |      |       |           |          |           |
|                         | 2622 | 0.841 | -4.0±7.8 | -1.2±2.3 | 8.63      |       | 2022 | 0.9   | -8.6±10.4 | -2.5±4.4 | 13.45     |
| <b>OMI vs O3Brewer</b>  |      |       |          |          |           |       |      |       |           |          |           |
|                         | 2622 | 0.843 | -2.8±8.4 | -0.8±2.5 | 8.85      |       | 2022 | 0.882 | -8.6±10.7 | -2.5±4.8 | 13.74     |
| <b>OMI vs EUBREWNET</b> |      |       |          |          |           |       |      |       |           |          |           |
|                         | 2522 | 0.814 | -2.8±9.6 | -0.8±2.7 | 9.99      |       | 1849 | 0.835 | -8.2±10.5 | -2.4±3.5 | 13.30     |

When comparing RMSE values it can be noticed that RMSE at Rome is lower than that found at Aosta, which supports the observed scatter plot shown in Fig. 16.

Besides, systematic differences between ozone estimated from OMI and from Brewer at Aosta could be related to the ground pixel size which can affect ozone amounts probed by the satellite, due to the complex orography of the valley.
